# Supplementary material for: Risk of long-term benzodiazepine and Z-drug use following the first prescription among community-dwelling adults with anxiety/mood and sleep disorders: a retrospective cohort study
Source: HighWire-hosted journal article supplement (doi:10.1136/bmjopen-2020-046916), 2021-11-01
Supplement: bmjopen-2020-046916supp001_data_supplement.pdf [file bmjopen-2020-046916supp001_data_supplement.pdf]

## **Supplemental Appendix Tables**

**Table A1 –Raw Data Sources and Relevant Corresponding Data Elements**

| <b>Database</b>                                          | <b>Date Range of Data</b>  | <b>Relevant Data Elements</b>                                                                                                                                                                                                                                      |
|----------------------------------------------------------|----------------------------|--------------------------------------------------------------------------------------------------------------------------------------------------------------------------------------------------------------------------------------------------------------------|
| Drug Program Information Network (DPIN)                  | Apr. 1/2000 – Mar. 31/2016 | Prescriptions for benzodiazepines (ATC codes N03AE, N05BA, N05CD), Z-Drugs (N05CF), Antidepressants, Antipsychotics, Mood stabilisers, Lithium and Opioids<br><br>-Drug, dosage strength, dosage type, metric quantity dispensed, day supply, date of dispensation |
| Manitoba Health Insurance Registry                       | Apr. 1/1996 – Mar. 31/2016 | Birth date/age of patient; sex; location of residence, marital status, date of Manitoba Health coverage, date of coverage end, reason for coverage end (i.e death, emigration etc.)                                                                                |
| Medical Claims (Physician Billings)                      | Apr. 1/1996 – Mar. 31/2016 | Services - type of physician (e.g., psychiatrist); dates of services, specific diagnoses (ICD-9 or ICD-10 equivalent)                                                                                                                                              |
| Hospital Separations Abstracts                           | Apr. 1/1996 – Mar. 31/2016 | Diagnoses (ICD-9 or ICD-10 equivalent), length of stay, admission dates, discharge dates,                                                                                                                                                                          |
| Provider Registry/Physician Master File                  | Apr. 1/1996 – Mar. 31/2016 | Physician Age, Sex, Specialty                                                                                                                                                                                                                                      |
| Social Allowances Management Information Network (SAMIN) | Apr. 1/2001– Mar. 31/2013  | Receipt of income assistance                                                                                                                                                                                                                                       |

**Table A2 – International Classification for Disease Coding for Mood/Anxiety/Sleep Disorders (Cohort Inclusion)**

|  | <b>Source 1 - CPHA</b> | <b>Source 2 - MCHP</b> | <b>Study Algorithm</b> |
|--|------------------------|------------------------|------------------------|
|  |                        |                        |                        |

|                 |                                                                        |                                                                                                                                      |                                                                                                                                                                                                                  |
|-----------------|------------------------------------------------------------------------|--------------------------------------------------------------------------------------------------------------------------------------|------------------------------------------------------------------------------------------------------------------------------------------------------------------------------------------------------------------|
| ICD Codes       | <u>All Mental Health Disorders:</u><br>9-CM: 290-319<br>10-CA: F00-F99 | <u>Mood Disorders:</u> 296 and 311 (ICD-9-CM) or F30-F34, F39 (ICD 10-CA)<br><br><u>Anxiety Disorders:</u> 300 (ICD-9-CM) or F40-F42 | <u>Mood disorders:</u> 296 and 311 (ICD-9-CM) or F30-F34, F39 (ICD 10-CA)<br><br><u>Anxiety disorders:</u> 300 (ICD-9-CM) or F40-F43 (ICD-10-CA)<br><br><u>Sleep disorders:</u> 307, 780 or F51, G47 (ICD-10-CA) |
| Case Definition | ≥1 hospitalization or outpatient medical claim within 1 year           | ≥1 hospitalization or ≥1-3 outpatient medical claims within 3-5 years*                                                               | ≥1 hospitalization or ≥3 outpatient medical claims within 5 years**                                                                                                                                              |

\*Range of similar definitions between studies from 2000 to 2016

\*\*The decision to use a 5-year pre-exposure window was based on the fact that all patients received a BZRA, which itself increases specificity for anxiety/sleep disorder diagnoses.

**Table A3 – International Classification for Disease Coding Algorithms for Seizure, Cancer and Palliation (Cohort Exclusion)**

|                 | <b>Seizure</b>                                                                     | <b>Cancer and other Neoplasms</b>                                                   | <b>Palliation</b>                                                  |
|-----------------|------------------------------------------------------------------------------------|-------------------------------------------------------------------------------------|--------------------------------------------------------------------|
| ICD Codes       | 9-CM: 345<br>10-CA: G40                                                            | 9-CM: 140-165, 170-176, 179-195, 200-208<br><br>10-CA: C00-C99                      | N/A*                                                               |
| Case Definition | ≥1 hospitalization or ≥3 outpatient medical claim within 5 years before index date | ≥1 hospitalization or ≥3 outpatient medical claims within 5 years before index date | Carrier code indicating palliative drug program enrollment in DPIN |

\*While ICD codes do exist for palliation, the DPIN carrier code '04' is expected to be a reliable indicator of when patients become ill enough that community use of medication is required for symptom management.

**Table A4 – Independent ‘Patient’ Variables for Prediction of Long-Term BZRA Use**

| <b>Baseline Patient Characteristics</b>   | <b>Definition (Variable Type)</b>                                                                                                                                                                                                                                                                                                                                                                                                        | <b>Measurement Period</b>                                    |
|-------------------------------------------|------------------------------------------------------------------------------------------------------------------------------------------------------------------------------------------------------------------------------------------------------------------------------------------------------------------------------------------------------------------------------------------------------------------------------------------|--------------------------------------------------------------|
| Age                                       | <i>3 age groups; 18-44, 45-64, 65+ (Ordinal)</i>                                                                                                                                                                                                                                                                                                                                                                                         | <i>Index Date</i>                                            |
| Sex                                       | <i>Male or Female (Dichotomous Categorical)</i>                                                                                                                                                                                                                                                                                                                                                                                          | <i>Index Date</i>                                            |
| Region                                    | <i>Urban; Winnipeg or Brandon postal-codes<br/>Rural; Any other Manitoba postal-code (Dichotomous Categorical)</i>                                                                                                                                                                                                                                                                                                                       | <i>Census Period closest in time to the index date</i>       |
| Socioeconomic Status                      | <i>Socio-Economic Factor Index – Version 2 (SEFI-2) score composite of four variables based on geography;<br/>i) unemployment rate<br/>ii) average household income<br/>iii) proportion of single-parent households<br/>iv) proportion of population without high school education.<br/>Scores &lt;0 indicate more favourable socioeconomic conditions<br/>Scores &gt;0 indicate less ideal socioeconomic conditions (Ordinal Scale)</i> | <i>Census Period closest in time to the index date</i>       |
| Income Assistance                         | <i>Record of income assistance (Dichotomous Categorical)</i>                                                                                                                                                                                                                                                                                                                                                                             | <i>Up to 1-year before the Index Date</i>                    |
| Marriage Record                           | <i>Record of Marriage (Dichotomous Categorical)</i>                                                                                                                                                                                                                                                                                                                                                                                      | <i>Entire available registry period up to the Index Date</i> |
| Residential Mobility (i.e frequent mover) | <i>Average of 1 move every 3 years from beginning of registry coverage to index date (Dichotomous)</i>                                                                                                                                                                                                                                                                                                                                   | <i>Entire available registry period up to the Index Date</i> |
| Comorbidity Burden                        | <i>Charlson Comorbidity Index (CCI) Score; 0, 1, 2+ (Ordinal Scale)</i>                                                                                                                                                                                                                                                                                                                                                                  | <i>Up to 1-year before the Index Date</i>                    |
| Healthcare Resource Use                   | <i>Johns Hopkins Adjusted Clinical Groups Resource Utilization Band (Ordinal)</i>                                                                                                                                                                                                                                                                                                                                                        | <i>Up to 1-year before the Index Date</i>                    |

|                                          |                                                                        |                                                                             |
|------------------------------------------|------------------------------------------------------------------------|-----------------------------------------------------------------------------|
|                                          | <i>Scale); placement into a band (0 to 5) based on grouping of ICD</i> |                                                                             |
| Prescription Psychotropic Use (non-BZRA) | <i>Receipt of Prescription (Dichotomous Categorical)</i>               | <i>Up to 1-year before the Index Date and 6 months after the Index Date</i> |
| Prescription Opioid Use                  | <i>Receipt of Prescription (Dichotomous Categorical)</i>               | <i>Up to 1-year before the Index Date and 6 months after the Index Date</i> |

**Table A5 - Independent ‘First-Prescription’ Variables for Prediction of Long-Term BZRA Use**

| <b>Characteristics of First Consultation and Subsequent Prescription</b> | <b>Definition</b>                                                                                                     | <b>Measurement Period</b> |
|--------------------------------------------------------------------------|-----------------------------------------------------------------------------------------------------------------------|---------------------------|
| Fiscal Year Period                                                       | <i>Fiscal year of first prescription Assigned to 3 five-year intervals; 2001-2005, 2006-2010, 2011-2015 (Ordinal)</i> | <i>Index Date</i>         |
| Prescriber                                                               | <i>10 Years or More (Dichotomous)</i>                                                                                 | <i>Index Date</i>         |
| Sex of Prescriber                                                        | <i>Male or Female (Dichotomous)</i>                                                                                   | <i>Index Date</i>         |
| Prescriber Specialty                                                     | <i>General Practitioner, Psychiatry or Other (Categorical)</i>                                                        | <i>Index Date</i>         |

**Table A6 – Logistic Regression Methodology**

| Criteria                      | Approach                                                                                                                                                                                                                                                                                   |
|-------------------------------|--------------------------------------------------------------------------------------------------------------------------------------------------------------------------------------------------------------------------------------------------------------------------------------------|
| Variable Selection            | -Informal selection via published literature<br>-Simple logistic regression; $\beta$ values ( $p < 0.25$ )                                                                                                                                                                                 |
| Variable Coding               | -Dichotomous Categorical; 0 or 1<br><br>-Ordinal; discrete number scale starting at 1<br><br>-Polychotomous Categorical; 0 or 1 with auto-generated dummy variables<br><br>-No continuous variables retained                                                                               |
| Events-per-Variable           | -Minimum 10 events per independent variable rule                                                                                                                                                                                                                                           |
| Conformity of Linear Gradient | -Ordered categorical variables assessed for conformity of linear gradient; nonconformity handled by variable transformation or separation into additional (design) variables (i.e fiscal year was shown to be linear with respect to outcome so condensed variable into 5-year increments) |
| Interaction effects           | -Assessed at $p < 0.01$ . Suspected interactions included; age*sex, residential mobility*SEFI*income assistance, psychotropic use*opioid use, RUB*CCI                                                                                                                                      |
| Collinearity                  | -Analysis of variance inflation factor, correlation coefficients, eigenvalues<br><br>-Significant collinearity; combine variables or removal of inferior explanatory variable                                                                                                              |
| Statistical Significance      | -Wald 95% CI for $\beta$ and OR's                                                                                                                                                                                                                                                          |
| Goodness-of-Fit Measures      | -C-statistic, Log-Likelihood Ratio, Hosmer-Lemeshow Statistic                                                                                                                                                                                                                              |
| Fitting Procedure             | -Stepwise addition/subtraction of variables<br>-Assessment of clinical significance                                                                                                                                                                                                        |

**Table A7 – Goodness of Fit for Final Logistic Regression Models Predicting Long-Term Use of BZRA**

| <b>Model</b> | <b>Model Type</b>                  | <b>Independent Variables</b>                                                                                                                                            | <b>Likelihood Ratio<br/>(higher is better)</b> | <b>C statistic</b> | <b>Hosmer-Lemeshow Chi-Square Statistic</b> |
|--------------|------------------------------------|-------------------------------------------------------------------------------------------------------------------------------------------------------------------------|------------------------------------------------|--------------------|---------------------------------------------|
| 1            | Main-Effects                       | 9 Variables;<br><br>Age-Sex Category,<br>Period of First Rx,<br>Psychotropic Use,<br>Opioid Use, Income Assistance, Marriage, RUB<br>CCI Score,<br>Residential Mobility | 6932<br>(p < 0.001)                            | 0.738              | 10.78<br>(p = 0.215)                        |
| 2            | Main-Effects + Interaction Effects | 10 Variables:<br><br>All from Model 1 +<br>Residential Mobility*Income Assistance                                                                                       | 6945<br>(p < 0.001)                            | 0.739              | 11.02<br>(p = 0.20)                         |

**Table A8 – Proportion of Long-Term BZRA Use by Differing Parameters and Duration Thresholds**

| Scenario* | Long-Term Use Parameter                    | Prescription Lapse Criteria           | Patients (n) | Proportion of Cohort |
|-----------|--------------------------------------------|---------------------------------------|--------------|----------------------|
| A1**      | First-Use Episode $\geq 180$ days          | 30 days or 50% of previous Day Supply | 9,327        | 4.51%                |
| A2        | First-Use Episode $\geq 90$ days           | 30 days or 50% of previous Day Supply | 13,745       | 6.64%                |
| A3        | First-Use Episode $\geq 60$ days           | 30 days or 50% of previous Day Supply | 19,948       | 9.64%                |
| A4        | First-Use Episode $\geq 180$ days          | 60 Days or 50% of previous Day Supply | 13,050       | 6.31%                |
| A5        | First-Use Episode $\geq 180$ days          | 90 Days                               | 16,831       | 8.13%                |
| A6        | First-Use Episode $\geq 270$ days          | 90 Days                               | 15,214       | 7.35%                |
| A7        | First-Use Episode $\geq 365$ days          | 90 Days                               | 14,219       | 6.87%                |
| B1        | Mean Episode Duration $\geq 180$ days      | 30 days or 50% of previous Day Supply | 38,853       | 18.78%               |
| B2        | Mean Episode Duration $\geq 90$ days       | 30 days or 50% of previous Day Supply | 58,442       | 28.24%               |
| B3        | Mean Episode Duration $\geq 60$ days       | 30 days or 50% of previous Day Supply | 72,639       | 35.10%               |
| B4        | Mean Episode Duration $\geq 180$ days      | 60 Days or 50% of previous Day Supply | 44,593       | 21.55%               |
| B5        | Mean Episode Duration $\geq 180$ days      | 90 Days                               | 50,142       | 24.23%               |
| B6        | User Mean Episode Duration $\geq 270$ days | 90 Days                               | 39,395       | 19.04%               |
| B7        | User Mean Episode Duration $\geq 365$ days | 90 Days                               | 32,200       | 15.56%               |

\*A=First Episode Scenario; B=Mean Episode Duration Scenario

\*\*Primary Scenario Used for Logistic Regression

**Table A9 - Proportion of Long-Term Z-Drug Use by Differing Parameters and Duration Thresholds**

| Scenario | Long-Term Use Parameter                    | Prescription Lapse Criteria           | Patients (n) | Proportion of Sub-Cohort |
|----------|--------------------------------------------|---------------------------------------|--------------|--------------------------|
| A1       | First-Use Episode $\geq 180$ days          | 30 days or 50% of previous Day Supply | 8,206        | 7.41%                    |
| A2       | First-Use Episode $\geq 90$ days           | 30 days or 50% of previous Day Supply | 12,155       | 11.0%                    |
| A3       | First-Use Episode $\geq 60$ days           | 30 days or 50% of previous Day Supply | 17,126       | 15.5%                    |
| A4       | First-Use Episode $\geq 180$ days          | 60 Days or 50% of previous Day Supply | 10,437       | 9.43%                    |
| A5       | First-Use Episode $\geq 180$ days          | 90 Days                               | 12,719       | 11.49%                   |
| A6       | First-Use Episode $\geq 270$ days          | 90 Days                               | 11,117       | 10.04%                   |
| A7       | First-Use Episode $\geq 365$ days          | 90 Days                               | 10,045       | 9.07%                    |
| B1       | User Mean Episode Duration $\geq 180$ days | 30 days or 50% of previous Day Supply | 21,859       | 19.75%                   |
| B2       | User Mean Episode Duration $\geq 90$ days  | 30 days or 50% of previous Day Supply | 32,020       | 28.92%                   |
| B3       | User Mean Episode Duration $\geq 60$ days  | 30 days or 50% of previous Day Supply | 39,690       | 35.85%                   |
| B4       | User Mean Episode Duration $\geq 180$ days | 60 Days or 50% of previous Day Supply | 24,098       | 21.77%                   |
| B5       | User Mean Episode Duration $\geq 180$ days | 90 Days                               | 26,477       | 23.92%                   |
| B6       | User Mean Episode Duration $\geq 270$ days | 90 Days                               | 21,040       | 19.01%                   |
| B7       | User Mean Episode Duration $\geq 365$ days | 90 Days                               | 17,358       | 15.68%                   |

**Table A10 – Patient Characteristics of Z-Drug Users by First Use Episode Duration**

|                                                           |                             | Short-term            | Long-term           | Total                 |
|-----------------------------------------------------------|-----------------------------|-----------------------|---------------------|-----------------------|
| <b>Number of Users</b>                                    |                             | <b>102,459 (100%)</b> | <b>8,204 (100%)</b> | <b>110,663 (100%)</b> |
| <i>Sex Distribution</i>                                   | <i>Male</i>                 | 40,516 (39.5%)        | 3,473 (42.3%)       | 43,989 (39.8%)        |
|                                                           | <i>Female</i>               | 61,943 (60.5%)        | 4,731 (57.7%)       | 66,674 (60.2%)        |
| <i>Age Category</i>                                       | <i>18-44</i>                | 42,663 (41.6%)        | 1,795 (21.9%)       | 44,458 (40.2%)        |
|                                                           | <i>45-64</i>                | 39,817 (38.9%)        | 3,184 (38.8%)       | 43,001 (38.9%)        |
|                                                           | <i>65+</i>                  | 20,011 (19.5%)        | 3,227 (39.3%)       | 23,238 (21.0%)        |
| <i>SEFI-2 Score</i>                                       | <i>&lt;-1</i>               | 13,678 (13.3%)        | 981 (12.0%)         | 14,659 (13.2%)        |
|                                                           | <i>-1 to 0</i>              | 45,136 (44.1%)        | 3,674 (44.8%)       | 48,810 (44.1%)        |
|                                                           | <i>0 to 1</i>               | 33,719 (32.9%)        | 2,885 (35.2%)       | 36,604 (33.1%)        |
|                                                           | <i>&gt;1</i>                | 9,958 (9.7%)          | 666 (8.1%)          | 10,624 (9.6%)         |
| <i>Residence Distribution</i>                             | <i>Urban</i>                | 63,207 (61.7%)        | 3,313 (40.4%)       | 66,520 (60.1%)        |
|                                                           | <i>Rural</i>                | 39,284 (38.3%)        | 4,893 (59.6%)       | 44,177 (39.9%)        |
| <i>High Residential Mobility</i>                          |                             | 22,408 (21.9%)        | 2,523 (30.8%)       | 24,931 (22.5%)        |
| <i>Receipt of Income Assistance</i>                       |                             | 8,351 (8.2%)          | 758 (9.2%)          | 9,109 (8.2%)          |
| <i>Marriage Record</i>                                    |                             | 57,308 (55.9%)        | 4,595 (56.0%)       | 61,903 (55.9%)        |
| <i>Johns Hopkins Healthcare Resource Utilization Band</i> | <i>0 (no utilization)</i>   | 1,771 (1.7%)          | 234 (2.9%)          | 2,005 (1.8%)          |
|                                                           | <i>1</i>                    | 3,205 (3.1%)          | 175 (2.1%)          | 3,380 (3.1%)          |
|                                                           | <i>2</i>                    | 17,523 (17.1%)        | 1,012 (12.3%)       | 18,535 (16.7%)        |
|                                                           | <i>3</i>                    | 65,067 (63.5%)        | 4,699 (57.3%)       | 69,766 (63.0%)        |
|                                                           | <i>4</i>                    | 10,810 (10.6%)        | 1,259 (15.3%)       | 12,069 (10.9%)        |
|                                                           | <i>5 (high-utilization)</i> | 4,083 (4.0%)          | 825 (10.1%)         | 4,908 (4.4%)          |

|                                                         |                      | Short-term            | Long-term           | Total                 |
|---------------------------------------------------------|----------------------|-----------------------|---------------------|-----------------------|
| <b>Number of Users</b>                                  |                      | <b>102,459 (100%)</b> | <b>8,204 (100%)</b> | <b>110,663 (100%)</b> |
| <i>Charlson Comorbidity index Score</i>                 | 0                    | 72,490 (70.8%)        | 4,528 (55.2%)       | 77,018 (69.6%)        |
|                                                         | 1                    | 19,495 (19.0%)        | 1,905 (23.2%)       | 21,400 (19.3%)        |
|                                                         | 2+                   | 10,506 (10.3%)        | 1,773 (21.6%)       | 12,279 (11.1%)        |
| <i>Non-BZRA Psychotropic Prescription Dispensations</i> | 0                    | 27,797 (27.1%)        | 1,784 (21.7%)       | 29,581 (26.7%)        |
|                                                         | 1                    | 36,939 (36.1%)        | 2,156 (26.3%)       | 39,095 (35.3%)        |
|                                                         | 2+                   | 37,755 (36.8%)        | 4,266 (52.0%)       | 42,021 (38.0%)        |
| <i>Opioid Prescription Dispensations</i>                | 0                    | 47,427 (46.3%)        | 3,298 (40.2%)       | 50,725 (45.8%)        |
|                                                         | 1                    | 34,505 (33.7%)        | 2,772 (33.8%)       | 37,277 (33.7%)        |
|                                                         | 2+                   | 20,559 (20.1%)        | 2,136 (26.0%)       | 22,695 (20.5%)        |
| <i>Sex of Prescriber Issuing First Prescription</i>     | Male                 | 71,485 (69.8%)        | 5,627 (68.6%)       | 77,112 (69.7%)        |
|                                                         | Female               | 28,485 (27.8%)        | 2,273 (27.7%)       | 30,758 (27.8%)        |
| <i>Age of Prescriber Issuing First Prescription</i>     | 50+ Years            | 47,871 (46.7%)        | 4,014 (48.9%)       | 51,885 (46.9%)        |
|                                                         | <50 Years            | 49,257 (48.1%)        | 3,758 (45.8%)       | 53,015 (47.9%)        |
| <i>Type of Prescriber Issuing First Prescription</i>    | General Practitioner | 78,610 (76.7%)        | 6,366 (77.6%)       | 84,976 (76.8%)        |
|                                                         | Psychiatry           | 3,912 (3.8%)          | 475 (5.8%)          | 4,387 (4.0%)          |
|                                                         | Other                | 3,881 (3.8%)          | 381 (4.6%)          | 4,262 (3.9%)          |
| <i>Period of First Prescription</i>                     | 2001-2006            | 34,360 (33.5%)        | 1,526 (18.6%)       | 35,886 (32.4%)        |
|                                                         | 2006-2011            | 37,752 (36.8%)        | 2,808 (34.2%)       | 40,560 (36.7%)        |
|                                                         | 2011-2016            | 30,379 (29.6%)        | 3,872 (47.2%)       | 34,251 (31.0%)        |

**Table A11 – Frequency of Charlson Comorbidity Group Diagnoses by First Use Episode Duration for Z-Drug Cohort**

| <b>Charlson Diagnosis</b>           | <b>Short-Term ‘First-Episode’ Users<br/>(<i>n</i>=102,459)</b> | <b>Long-Term ‘First-Episode’ Users<br/>(<i>n</i>=8,204)</b> | <b>Z-Test of Two Proportions</b> |
|-------------------------------------|----------------------------------------------------------------|-------------------------------------------------------------|----------------------------------|
| Myocardial Infarction               | 1,836 (1.8%)                                                   | 306 (3.7%)                                                  | $p < 0.01$                       |
| Congestive Heart Failure            | 3,174 (3.1%)                                                   | 700 (8.5%)                                                  | $p < 0.01$                       |
| Peripheral Vascular Disease         | 1,772 (1.7%)                                                   | 284 (3.5%)                                                  | $p < 0.01$                       |
| Cerebrovascular Disease             | 2,321 (2.3%)                                                   | 550 (6.7%)                                                  | $p < 0.01$                       |
| Dementia                            | 1,925 (1.9%)                                                   | 865 (10.5%)                                                 | $p < 0.01$                       |
| COPD                                | 12,357 (12.1%)                                                 | 1,171 (14.3%)                                               | $p < 0.01$                       |
| Connective Tissue/Rheumatic Disease | 1,906 (1.9%)                                                   | 243 (3.0%)                                                  | $p < 0.01$                       |
| Peptic Ulcer Disease                | 1,111 (1.1%)                                                   | 123 (1.5%)                                                  | $p < 0.01$                       |
| Mild Liver Disease                  | 1,672 (1.6%)                                                   | 139 (1.7%)                                                  | $p = 0.33$                       |
| Moderate/Severe Liver Disease       | 275 (0.2%)                                                     | 38 (0.4%)                                                   | $p < 0.01$                       |
| Uncomplicated Diabetes              | 9,317 (9.1%)                                                   | 1,150 (14.0%)                                               | $p < 0.01$                       |
| Complicated Diabetes                | 1,639 (1.6%)                                                   | 328 (4.0%)                                                  | $p < 0.01$                       |
| Paraplegia and Hemiplegia           | 508 (0.5%)                                                     | 136 (1.7%)                                                  | $p < 0.01$                       |
| Renal Disease                       | 1,543 (1.5%)                                                   | 293 (3.6%)                                                  | $p < 0.01$                       |
| Cancer                              | 2,109 (2.1%)                                                   | 247 (3.0%)                                                  | $p < 0.01$                       |
| Metastatic Carcinoma                | 429 (0.4%)                                                     | 45 (0.5%)                                                   | $p = 0.04$                       |
| HIV/AIDS                            | 118 (0.1%)                                                     | 16 (0.2%)                                                   | $p = 0.02$                       |

**Table A12 – Statistical Associations between Predictor Variables and Long-term Use of Z-Drugs**

|                                    |                | <i>Use Duration</i>          |                                 |                              |                                 |                              |                                 |
|------------------------------------|----------------|------------------------------|---------------------------------|------------------------------|---------------------------------|------------------------------|---------------------------------|
| <u><b>Independent Variable</b></u> |                | <i>≥180 days</i>             |                                 | <i>≥90 days</i>              |                                 | <i>≥60 days</i>              |                                 |
|                                    |                | <i>Crude OR<br/>(95% CI)</i> | <i>Adjusted OR<br/>(95% CI)</i> | <i>Crude OR<br/>(95% CI)</i> | <i>Adjusted OR<br/>(95% CI)</i> | <i>Crude OR<br/>(95% CI)</i> | <i>Adjusted OR<br/>(95% CI)</i> |
| <i>Male</i>                        |                | 1.12<br>(1.07-1.18)          | 1.04<br>(0.99-1.09)             | 1.13<br>(1.08-1.17)          | 1.05<br>(1.01-1.10)             | 1.08<br>(1.05-1.12)          | 1.04<br>(1.00-1.08)             |
| <i>Age</i>                         | <i>18-44</i>   | 1 (ref)                      | 1 (ref)                         | 1 (ref)                      | 1 (ref)                         | 1 (ref)                      | 1 (ref)                         |
|                                    | <i>45-64</i>   | 1.90<br>(1.79-2.02)          | 2.02<br>(1.89-2.17)             | 1.74<br>(1.66-1.82)          | 1.78<br>(1.68-1.88)             | 1.71<br>(1.64-1.78)          | 1.68<br>(1.60-1.76)             |
|                                    | <i>65+</i>     | 3.83<br>(3.61-4.07)          | 3.71<br>(3.44-4.00)             | 3.24<br>(3.08-3.40)          | 3.08<br>(2.90-3.28)             | 2.99<br>(2.87-3.12)          | 2.78<br>(2.64-2.93)             |
| <i>Rural Residence</i>             |                | 0.92<br>(0.88-0.96)          | 1.13<br>(1.07-1.19)             | 0.99<br>(0.96-1.03)          | 1.02<br>(0.98-1.07)             | 1.08<br>(1.04-1.11)          | 0.95<br>(0.91-0.99)             |
| <i>High Residential Mobility</i>   |                | 1.59<br>(1.51-1.67)          | 1.26<br>(1.19-1.33)             | 1.53<br>(1.46-1.59)          | 1.21<br>(1.15-1.27)             | 1.30<br>(1.26-1.35)          | 1.12<br>(1.07-1.17)             |
| <i>Income Assistance</i>           |                | 1.15<br>(1.06-1.24)          | 1.47<br>(1.34-1.61)             | 1.02<br>(0.95-1.09)          | 1.29<br>(1.19-1.40)             | 0.82<br>(0.77-0.87)          | 1.08<br>(1.00-1.17)             |
| <i>SEFI-2 Score</i>                | <i>&lt;-1</i>  | 1 (ref)                      | 1 (ref)                         | 1 (ref)                      | 1 (ref)                         | 1 (ref)                      | 1 (ref)                         |
|                                    | <i>-1 to 0</i> | 1.14<br>(1.06-1.22)          | 1.07<br>(0.99-1.16)             | 1.03<br>(0.97-1.09)          | 0.98<br>(0.92-1.04)             | 0.95<br>(0.91-1.00)          | 0.94<br>(0.89-0.99)             |
|                                    | <i>0 to 1</i>  | 1.19<br>(1.11-1.29)          | 1.08<br>(0.99-1.17)             | 1.04<br>(0.98-1.11)          | 0.99<br>(0.93-1.06)             | 0.92<br>(0.87-0.97)          | 0.93<br>(0.88-0.99)             |
|                                    | <i>&gt;1</i>   | 0.93<br>(0.84-1.03)          | 0.84<br>(0.75-0.94)             | 0.80<br>(0.73-0.87)          | 0.77<br>(0.70-0.85)             | 0.68<br>(0.63-0.73)          | 0.72<br>(0.66-0.78)             |
| <i>Married</i>                     |                | 1.00<br>(0.96-1.05)          | 0.86<br>(0.82-0.91)             | 1.07<br>(1.03-1.10)          | 0.93<br>(0.89-0.98)             | 1.13<br>(1.10-1.17)          | 0.98<br>(0.94-1.01)             |
| <i>Opioid Use</i>                  |                | 1.28<br>(1.22-1.34)          | 1.15<br>(1.09-1.21)             | 1.26<br>(1.21-1.31)          | 1.15<br>(1.11-1.20)             | 1.18<br>(1.14-1.21)          | 1.11<br>(1.07-1.15)             |

| <b><u>Independent Variable</u></b>           |                          | <b><i>Use Duration</i></b>   |                                 |                              |                                 |                              |                                 |
|----------------------------------------------|--------------------------|------------------------------|---------------------------------|------------------------------|---------------------------------|------------------------------|---------------------------------|
|                                              |                          | <b><i>≥180 days</i></b>      |                                 | <b><i>≥90 days</i></b>       |                                 | <b><i>≥60 days</i></b>       |                                 |
|                                              |                          | <i>Crude OR<br/>(95% CI)</i> | <i>Adjusted OR<br/>(95% CI)</i> | <i>Crude OR<br/>(95% CI)</i> | <i>Adjusted OR<br/>(95% CI)</i> | <i>Crude OR<br/>(95% CI)</i> | <i>Adjusted OR<br/>(95% CI)</i> |
| <i>Psychotropic Rx Use (Non-BZRA)</i>        |                          | 1.34<br>(1.27-1.41)          | 1.24<br>(1.17-1.32)             | 1.35<br>(1.29-1.41)          | 1.27<br>(1.20-1.33)             | 1.22<br>(1.17-1.27)          | 1.19<br>(1.14-1.24)             |
| <i>Charlson Comorbidity Index Score</i>      | 0                        | 1 (ref)                      | 1 (ref)                         | 1 (ref)                      | 1 (ref)                         | 1 (ref)                      | 1 (ref)                         |
|                                              | 1                        | 1.56<br>(1.48-1.65)          | 1.25<br>(1.18-1.33)             | 1.45<br>(1.39-1.52)          | 1.21<br>(1.15-1.27)             | 1.33<br>(1.28-1.38)          | 1.13<br>(1.08-1.19)             |
|                                              | 2+                       | 2.70<br>(2.55-2.87)          | 1.46<br>(1.36-1.58)             | 2.34<br>(2.22-2.46)          | 1.38<br>(1.29-1.47)             | 2.02<br>(1.93-2.12)          | 1.30<br>(1.22-1.37)             |
| <i>Resource Utilization Band</i>             | 0-3 ( <i>≤Moderate</i> ) | 1 (ref)                      | 1 (ref)                         | 1 (ref)                      | 1 (ref)                         | 1 (ref)                      | 1 (ref)                         |
|                                              | 4 ( <i>High</i> )        | 1.67<br>(1.56-1.78)          | 1.16<br>(1.08-1.25)             | 1.47<br>(1.39-1.56)          | 1.09<br>(1.01-1.16)             | 1.30<br>(1.24-1.37)          | 1.00<br>(0.95-1.07)             |
|                                              | 5 ( <i>Very High</i> )   | 2.89<br>(2.67-3.13)          | 1.55<br>(1.41-1.70)             | 2.43<br>(2.26-2.61)          | 1.42<br>(1.30-1.55)             | 1.97<br>(1.85-2.11)          | 1.22<br>(1.12-1.32)             |
| <i>Male Prescriber of First Prescription</i> |                          | 0.99<br>(0.94-1.04)          | 0.97<br>(0.92-1.03)             | 0.98<br>(0.94-1.02)          | 0.98<br>(0.93-1.02)             | 0.94<br>(0.90-0.97)          | 0.93<br>(0.90-0.97)             |
| <i>Prescriber Age ≥50 Years</i>              |                          | 1.10<br>(1.05-1.15)          | 0.98<br>(0.93-1.03)             | 1.10<br>(1.06-1.15)          | 0.98<br>(0.94-1.02)             | 1.15<br>(1.11-1.19)          | 1.05<br>(1.01-1.09)             |
| <i>Prescriber of First Prescription</i>      | GP                       | 1 (ref)                      | 1 (ref)                         | 1 (ref)                      | 1 (ref)                         | 1 (ref)                      | 1 (ref)                         |
|                                              | Psychiatrist             | 1.50<br>(1.36-1.66)          | 1.96<br>(1.76-2.17)             | 1.36<br>(1.25-1.49)          | 1.72<br>(1.57-1.89)             | 1.11<br>(1.02-1.20)          | 1.38<br>(1.27-1.51)             |
|                                              | Other                    | 1.21<br>(1.09-1.35)          | 0.92<br>(0.82-1.03)             | 1.18<br>(1.07-1.29)          | 0.91<br>(0.83-1.00)             | 1.19<br>(1.10-1.29)          | 0.98<br>(0.91-1.07)             |
| <i>Period of First Prescription</i>          | 2001-2006                | 1 (ref)                      | 1 (ref)                         | 1 (ref)                      | 1 (ref)                         | 1 (ref)                      | 1 (ref)                         |
|                                              | 2006-2011                | 1.68<br>(1.57-1.79)          | 1.57<br>(1.46-1.68)             | 1.67<br>(1.59-1.76)          | 1.56<br>(1.47-1.66)             | 1.53<br>(1.46-1.60)          | 1.46<br>(1.39-1.54)             |
|                                              | 2011-2015                | 2.87<br>(2.70-3.05)          | 2.45<br>(2.28-2.65)             | 2.83<br>(2.69-2.97)          | 2.44<br>(2.30-2.59)             | 2.20<br>(2.10-2.29)          | 1.96<br>(1.86-2.07)             |
